# Supplementary material for: Clinical Outcomes and Adverse Effects in Septic Patients with Impaired Renal Function Who Received Different Dosages of Cefoperazone–Sulbactam
Source: MDPI journal article supplement (doi:10.3390/antibiotics11040460), 2022-03-29
Supplement: s1 [file s1]

**Supplementary Table S1.** Codes for disease definitions in the study

| Disease                                                  | ICD 9 code                      | ICD 10 code                                                                                                                                |
|----------------------------------------------------------|---------------------------------|--------------------------------------------------------------------------------------------------------------------------------------------|
| Myocardial infarction                                    | 410-412                         | I20, I21, I25.2                                                                                                                            |
| Congestive heart failure                                 | 428                             | I50                                                                                                                                        |
| Peripheral vascular disease                              | 441, 443.9, 785.4, V43.4        | I71, I79.0, I73.9, R02, Z95.8, Z95.9                                                                                                       |
| Cerebrovascular disease                                  | 430-438                         | I60-I66, I67.0-I67.2, I67.4-I67.9, I68.1, I68.2, I68.8, I69                                                                                |
| Dementia                                                 | 290                             | F00, F01, F02, F05.1                                                                                                                       |
| Chronic pulmonary disease                                | 490-496, 500-505                | J40-J47, J60-J67                                                                                                                           |
| Connective tissue disease                                | 517.1, 710, 714, 720            | M05.0-M05.3, M05.8-M06.0, M06.3, M06.9, M32, M33.2, M34, M35.3                                                                             |
| Peptic ulcer disease                                     | 521-534                         | K25-K28                                                                                                                                    |
| Mild liver disease                                       | 571.2, 571.4-571.6              | K70.2, K70.3, K73, K74.0, K74.2-K74.6                                                                                                      |
| Diabetes without end-organ damage                        | 250.0-250.3, 250.7              | E10.1, E10.5, E11.1, E11.5, E11.9, E13.1, E13.5, E13.9, E14.1, E14.5, E14.9                                                                |
| Diabetes with end-organ damage                           | 250.4-250.6                     | E10.2-E10.4, E11.2-E11.4, E13.2-E13.4, E14.2-E14.4                                                                                         |
| Hemiplegia                                               | 342, 344.1                      | G04.1, G81, G82.0-G82.2                                                                                                                    |
| Moderate or severe renal disease                         | 582, 583.0-583.7, 585, 586, 588 | N01, N03, N05.3-N05.6, N07.1-N07.3, N18, N19, N25                                                                                          |
| Tumor without metastasis (include leukemia and lymphoma) | 140-172, 174-195, 200-208       | C0-C3, C40, C41, C43, C45-C49, C5, C6, C70-C76, C80-C85, C88.3, C88.7, C88.9, C90.0, C90.1, C92, C93, C94.0-C94.3, C94.51, C94.7, C95, C96 |
| Severe liver disease                                     | 572.2-572.4, 572.8              | K72.9, K76.6, K76.6, K72.1                                                                                                                 |
| Metastatic solid tumor                                   | 196-198                         | C77-C80                                                                                                                                    |
| Acquired immunodeficiency syndrome                       | 042-044                         | B20-B24                                                                                                                                    |
